# Supplementary material
Source: PubMed Central journal article supplement (PMC2899892)
Supplement: NIHMS157136-supplement-01.pdf [file NIHMS157136-supplement-01.pdf]

**Supplemental Figure 2.** (A) Real Time PCR analysis of CHOP, GADD34, ATF4 mRNA in H4IIE liver cells and primary hepatocytes following 16 hour incubations in control media (LG), or control media supplemented with oleate (O, 250  $\mu$ M), linoleate (L, 250  $\mu$ M), palmitate (P, 250  $\mu$ M) or stearate (S, 250  $\mu$ M) in the absence (No Additions) or presence of BAPTA-AM (20  $\mu$ M) or EGTA (1 mM). LG with no additions was set to 1. (B) MTT cell viability assay following 16 hour incubations. Data are expressed as the mean  $\pm$  SD for 4-6 independent experiments.
